# Supplementary figures and images for: Preparation and Application of Nb2O5 Nanofibers in CO2 Photoconversion
Source: MDPI journal article supplement (doi:10.3390/nano11123268), 2021-12-01

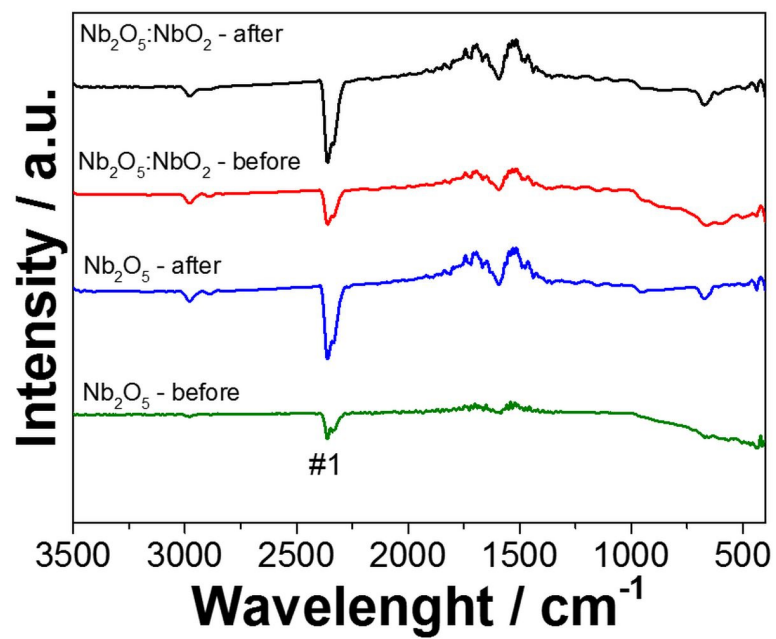

**Figure S1.** FTIR spectrum samples before and after the CO<sub>2</sub> photoreduction process.

Supplement: s1 [file nanomaterials-1450153-supplementary.pdf › nanomaterials-1450153-supplementary.pdf]
